# Supplementary material
Source: PubMed Central journal article supplement (PMC8042668)
Supplement: Supplementary_Data.pdf [file Supplementary_Data.pdf]

Figure S1. Mouse lincRNA Dleu2 transcript map. Location of mDleu2 which can encode 15 different transcripts; the spliced-in exons are shown by vertical bars, and the spliced-out introns are shown by horizontal lines. Promoter regions are shown in red at the bottom. Introns coding for miR-15/16 denoted by yellow star. Figure obtained from ENSEMBL ([uswest.ensembl.org/Mus\\_musculus/Gene/Summary?db=core;g=ENSMUSG00000097589;r=14:61602839-61682373](http://uswest.ensembl.org/Mus_musculus/Gene/Summary?db=core;g=ENSMUSG00000097589;r=14:61602839-61682373)). lincRNA, long non-coding RNA; miRNA/miR, microRNA; misc, miscellaneous; lincRNA, long intervening noncoding RNA; Dleu2, deleted in leukemia 2 gene.

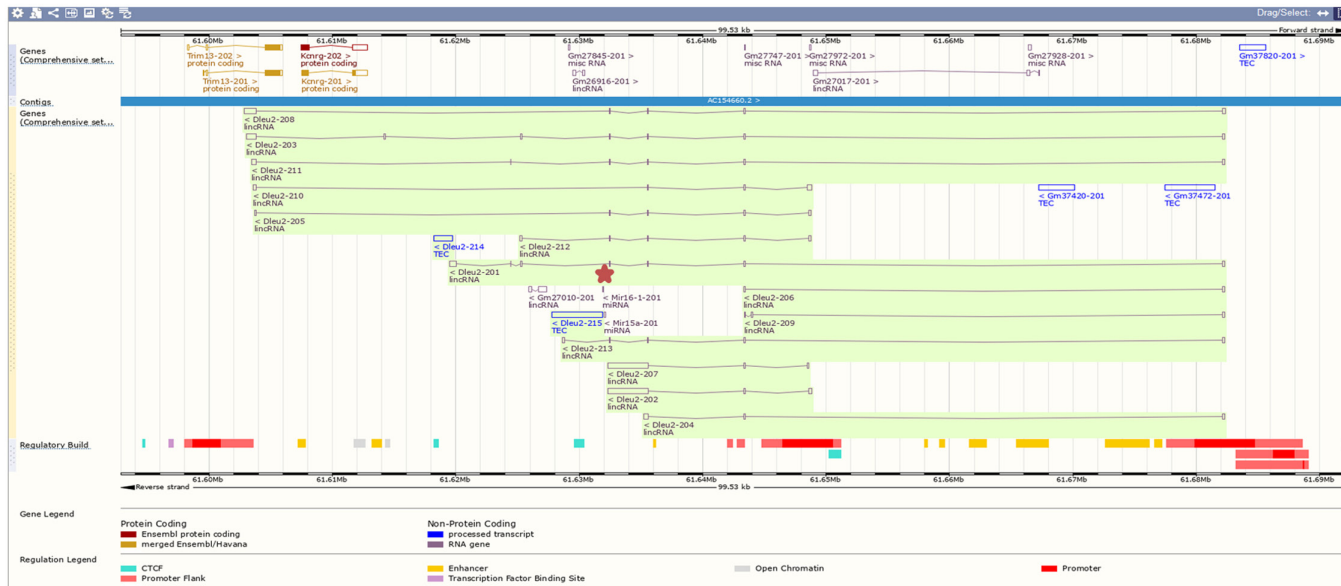

Figure S2. Expression of genes associated with proliferation. (A) PCNA, (B) TGF- $\beta$  and (C) EGFR expression in the negative control and Dleu2-silenced AML-12 cells. n=6. Data are presented as the mean  $\pm$  the standard error of the mean of at least 6 independent experiments. siRNA, small interfering RNA; Dleu2, deleted in leukemia 2 gene; PCNA, proliferating cell nuclear antique; TGF- $\beta$ , transforming growth factor- $\beta$ ; EGFR, epidermal growth factor receptor.

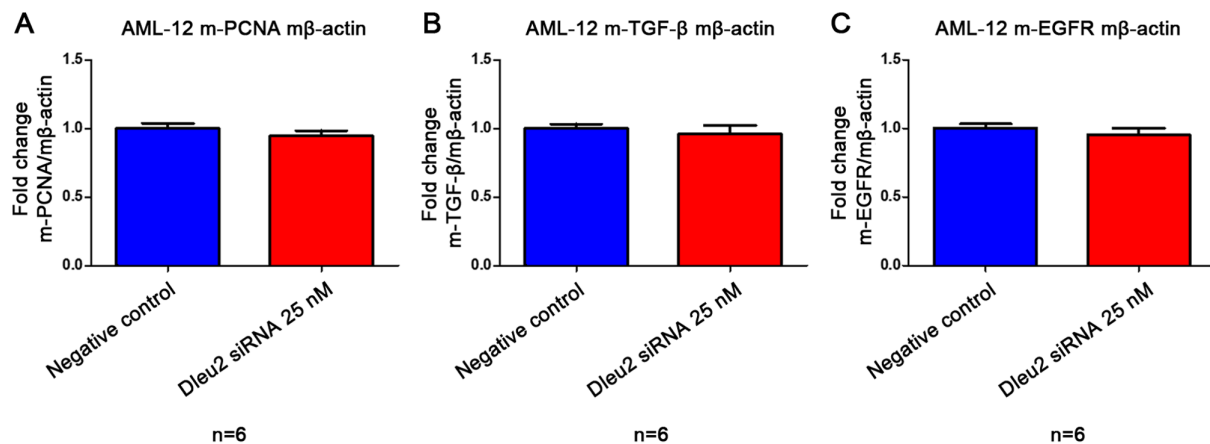

Figure S3. Differences between the mouse *Dleu2* splicing organization compared with Human *DLEU2* splicing organization. (A) Mouse *Dleu2* transcripts are more nested compared with (B) human *DLEU2*, which have a longer range away from the miR15a/16 loci and are more spread out across different promoter sites. Figures obtained from ENSEMBL ([uswest.ensembl.org/Mus\\_musculus/Gene/Summary?db=core;g=ENSMUSG00000097589;r=14:61602839-61682373](http://uswest.ensembl.org/Mus_musculus/Gene/Summary?db=core;g=ENSMUSG00000097589;r=14:61602839-61682373) and [uswest.ensembl.org/Homo\\_sapiens/Gene/Summary?db=core;g=ENSG00000231607;r=13:49956670-50125720](http://uswest.ensembl.org/Homo_sapiens/Gene/Summary?db=core;g=ENSG00000231607;r=13:49956670-50125720)). *Dleu2*/ *DLEU2*, deleted in leukemia 2 gene; lincRNA, long non-coding RNA; miRNA/miR, microRNA; misc, miscellaneous; lincRNA, long intervening noncoding RNA.

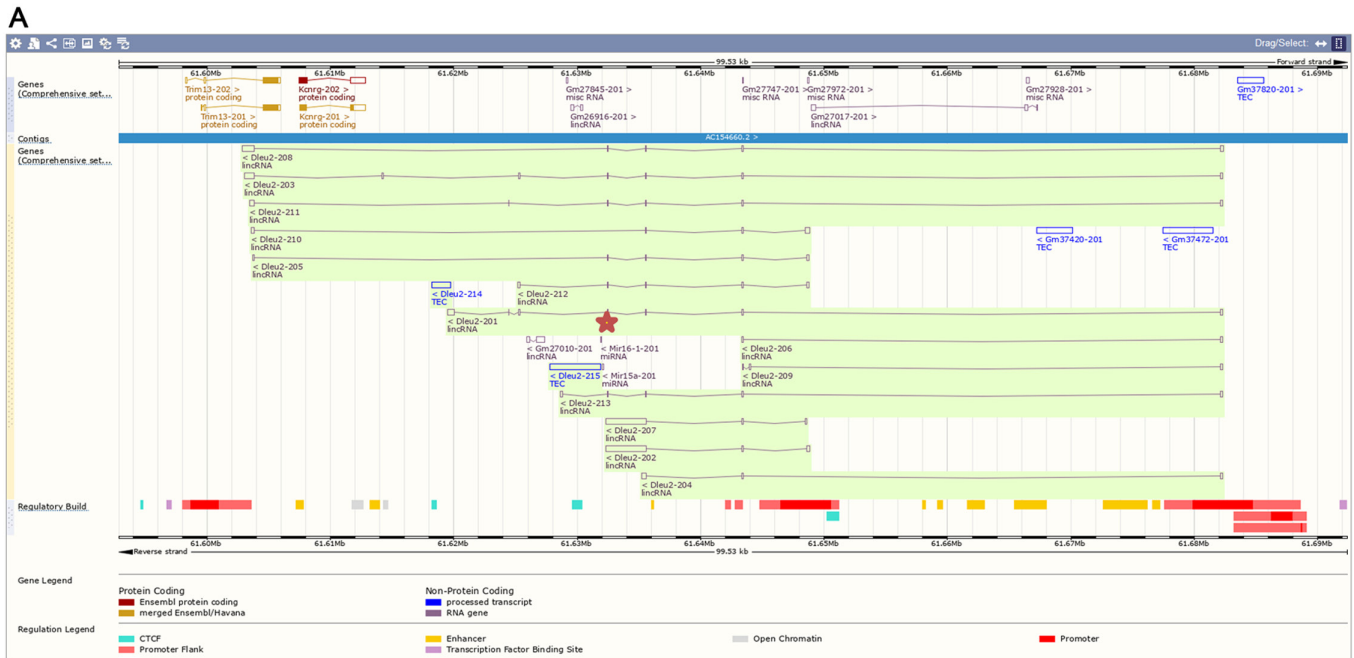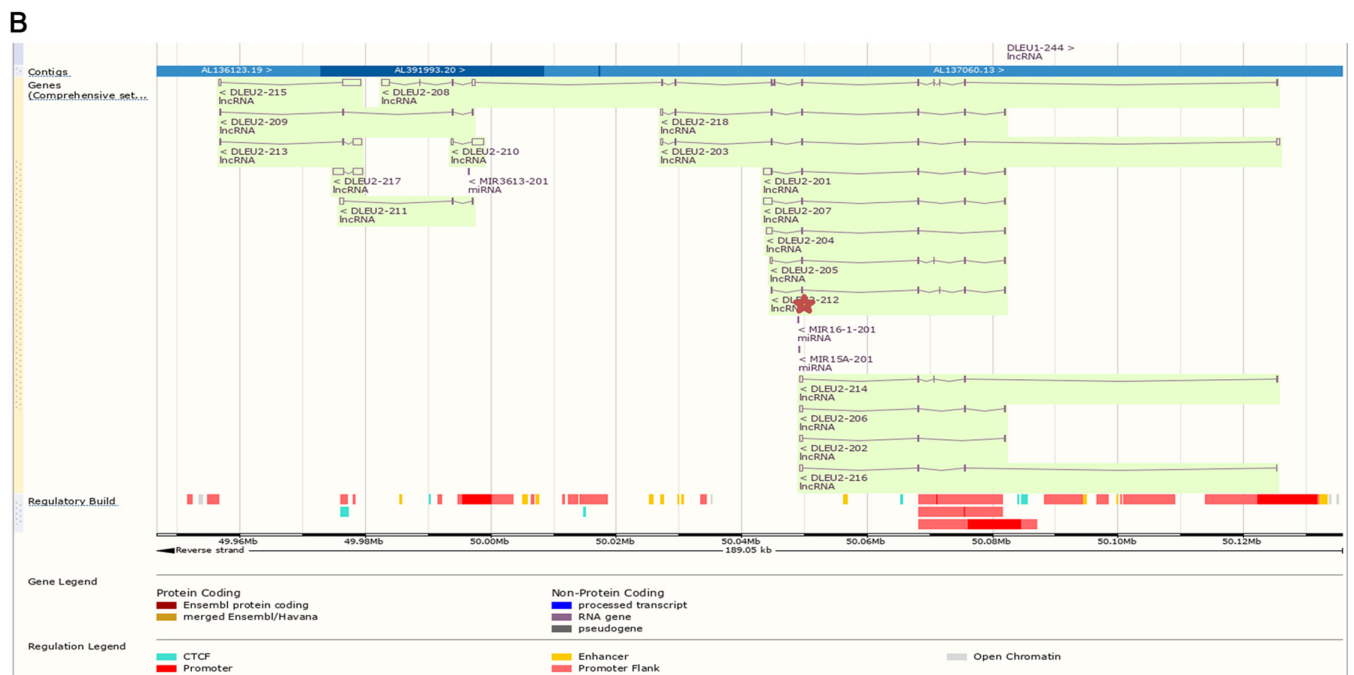

Table SI. Primer sets used for identifying mDleu2 transcripts and genes associated with proliferation<sup>a</sup>.

| Target             | Sequence, 5'-3'             | Length, bp |
|--------------------|-----------------------------|------------|
| mDleu2-Alt1        | GCGCTACACCGACTGACATT        | 125        |
| mDleu2-Alt1        | ACTGATTGGGTAGTGGCACAG       | 125        |
| mDleu2-208         | ATGTGAGGGTTATTGGGGAATT      | 117        |
| mDleu2-208         | GCCACACTCCAACCCTTTCT        | 117        |
| mDleu2-203         | TGACTTGAGTATGAAAGCTGTGA     | 51         |
| mDleu2-203         | ATCCATTCTGTCTGCCTGGC        | 51         |
| mDleu2-210         | AAGCGGGTCTCGAGAGGT          | 118        |
| mDleu2-210         | TAGCAACCGGATCCCCTGG         | 118        |
| mDleu2-201         | AGCAAGGAAGTTGGACGTGA        | 119        |
| mDleu2-201         | ATGGCTAGGATACACGCAGG        | 119        |
| mDleu2-Gm27010-201 | AGTGCTTTGTTGGCTCTCAA        | 102        |
| mDleu2-Gm27010-201 | GCCGCTGACAAACATGAACA        | 102        |
| mDleu2-204         | ACCCATCACCCTGCAATGA         | 113        |
| mDleu2-204         | ACATGAATAGAGTGTTAATGGCA     | 113        |
| mDleu2-215 TEC     | TGTGTAGTGCAGTGGGATGT        | 145        |
| mDleu2-215 TEC     | GACCCAGGCTCAAAGACCA         | 145        |
| mDleu2-213         | AGAACCTCAGAGGGCTCTACT       | 149        |
| mDleu2-213         | GGGGAGGAGAGGGTACTTCA        | 149        |
| mDleu2-207+202     | TGGCTATGGTTCAGAAGCGT        | 137        |
| mDleu2-207+202     | GTCCGAACCTGACACTGTC         | 137        |
| mDleu2-207+202     | AGAAGCGTCCTACAAAGGCT        | 122        |
| mDleu2-207+202     | CGAACCCTGACACTGTCCTT        | 122        |
| mDleu2-209 71      | TGTTAAGTCATTAAGAACCAGAAAGGG | 71         |
| mDleu2-209 71      | TCGAGGTGAAAATGCAACGTTAT     | 71         |
| mPCNA              |                             | -          |
| Forward            | TTTGAGGCACGCCTGATCC         |            |
| Reverse            | GGAGACGTGAGACGAGTCCAT       |            |
| mTGF- $\beta$      |                             | -          |
| Forward            | TCCAACCGCAGCTACTCTG         |            |
| Reverse            | CCCGTACAGGAAGCAGTTATTTT     |            |
| mEGFR              |                             | -          |
| Forward            | GCCATCTGGGCCAAAGATACC       |            |
| Reverse            | GTCTTCGCATGAATAGGCCAAT      |            |

<sup>a</sup>Primers targeting specific Dleu2 transcripts are shown outlined in various colors on ENSEMBL map in Fig. 1B.
